# Supplementary material
Source: publisher figshare collection journal article supplement (https://tandf.figshare.com/ndownloader/files/22088229)

Supp Figure 1


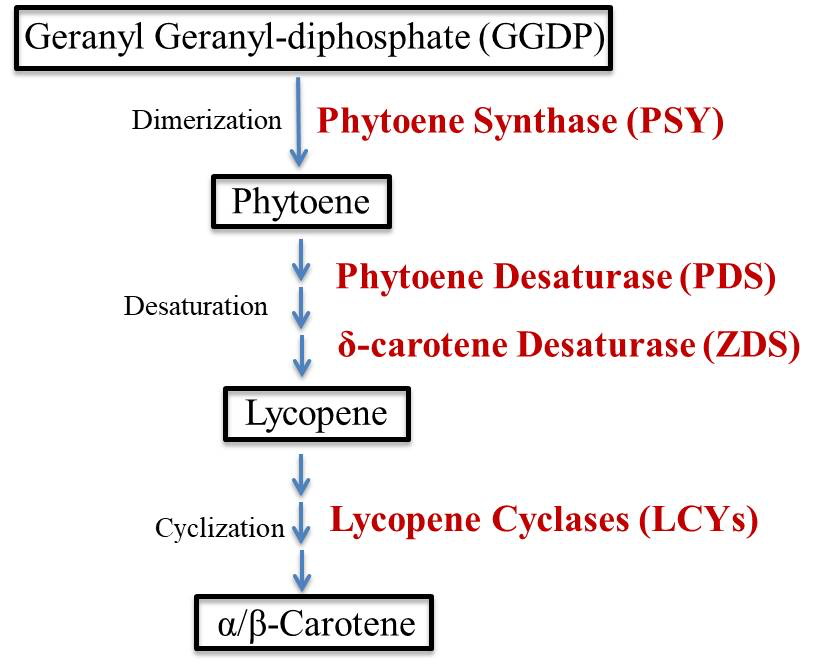


Supp Figure 2


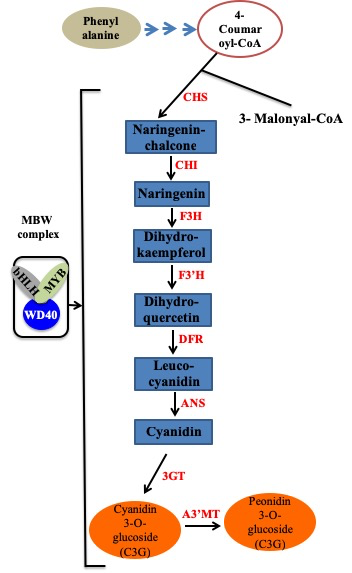

Supplement: Supplementary file 1 [file 22088229]
